# Supplementary material for: EB depth-curing as a facile method to prepare highly stable membranes
Source: Royal Society of Chemistry journal article supplement (doi:10.1039/c6ra12716a), 2016-01-01
Supplement: c6ra12716a1.pdf [file c6ra12716a1.pdf]

Electronic Supplementary Information (ESI)

## EB depth-curing as a facile method to prepare highly stable membranes

Veysi Altun<sup>a</sup>, Michael Biemann<sup>b</sup>, Ivo F. J. Vankelecom<sup>\*a</sup>

*\*corresponding author*

### 1. Experimental section

**Table 1** shows the cross-linkers used for the investigation of the influence of cross-linker type with different functionality and concentration on the E curing efficiency.

**Table 1.** List of cross-linkers, their name and structure.

| Cross-linker | Name                                                   | Structure                                                                            |
|--------------|--------------------------------------------------------|--------------------------------------------------------------------------------------|
| SR351        | trimethylolpropane triacrylate<br>(Sartomer™ SR351)    | 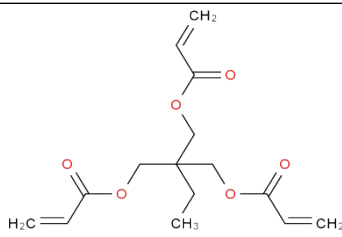  |
| SR295        | Pentaerythritol tetraacrylate<br>(Sartomer™ SR295)     |  |
| SR399LV      | dipentaerythritol pentaacrylate<br>(Sartomer™ SR399LV) |  |
